# Supplementary material
Source: HighWire-hosted journal article supplement (http://cmajopen.ca/highwire/filestream/84075/field_highwire_adjunct_files/0/2020-0047-1-at.pdf)
Supplement: 2020-0047-1-at.pdf [file 2020-0047-1-at.pdf]

## **Appendix 1 (as supplied by the authors)**

### Methods:

#### Health Outcome Adjudication in Cohort 1

##### Death and Myocardial Infarction:

In the Hamilton cohort, an emergency physician led an adjudication panel with the outcomes independently adjudicated by at least two members with disagreements not resolved by consensus referred to a third blinded reviewer using the Third Universal Definition of Myocardial Infarction as the basis for the diagnosis of MI.<sup>10</sup> Participants were followed for at least 30-days for mortality status and MI. For the MI outcome, the contemporary Abbott cTnI (ug/L) assay was used with a cTnI concentration of >0.03 ug/L (>99th) with a significant rise/fall (absolute delta  $\geq$ 0.03 ug/L for concentrations <0.10 ug/L or proportional changes of  $\geq$ 20% for concentrations  $\geq$ 0.10 ug/L, from n=1367 subsequent cTnI measurements with the median time (interquartile range) between 2nd and 1st samples = 3.03h (2.97-3.17)), or new ST segment elevation or depression indicative of ischemia; new left bundle branch block; coronary artery intervention or pathologic findings of an acute MI.

##### Unstable Angina and Revascularization:

Unstable angina (UA) was diagnosed when any of the following criteria were met: a discharge diagnosis of UA as per discharge summary and/or admission to hospital with ACS treatment [heparin or low molecular weight heparin, cardiac catheterization resulting in increased treatment (i.e., Plavix/ASA or revascularization)].

## Health Outcome in Cohort 2

### *Diagnosis/intervention codes used for clinical endpoint (MACE)*

| <u>Outcome</u>               | <u>Data source</u> | <u>Codes</u>                                                             |
|------------------------------|--------------------|--------------------------------------------------------------------------|
| <u>All-cause mortality</u>   | <u>RPDB</u>        | <u>Not applicable</u>                                                    |
| <u>Myocardial infarction</u> | <u>DAD</u>         | <u>Diagnosis codes (ICD-10):</u><br><u>I21 or I22</u>                    |
| <u>Angina</u>                | <u>DAD</u>         | <u>Diagnosis codes (ICD-10):</u><br><u>I20, I2382, or I24</u>            |
| <u>CABG</u>                  | <u>DAD</u>         | <u>Intervention codes (CCI):</u><br><u>1IJ76 or 1IJ80</u>                |
| <u>PCI</u>                   | <u>DAD or SDS</u>  | <u>Intervention codes (CCI):</u><br><u>1IJ26, 1IJ50, 1IJ55, or 1IJ57</u> |
